# Supplementary material for: Multi-parametric flow cytometric and genetic investigation of the peripheral B cell compartment in human type 1 diabetes
Source: PubMed Central journal article supplement (PMC4137841; doi:10.1111/cei.12362), 2014-07-24
Supplement: cei0177-0571-SD3.pdf [file cei0177-0571-SD3.pdf]

**Table S1. Antibodies and immunostaining panels used for flow cytometry.**

| <b>Immunostaining Panel</b> | <b>Antibody</b>              | <b>Fluorochrome</b> | <b>Clone</b>   | <b>Manufacturer</b> |
|-----------------------------|------------------------------|---------------------|----------------|---------------------|
| <b>Surface Panel 1</b>      | CD19                         | AF700               | HIB19          | BioLegend           |
|                             | CD27                         | BV421               | O323           | BioLegend           |
|                             | CD38                         | PE-Cy7              | HIT2           | BioLegend           |
|                             | CD24                         | FITC                | ML5            | BioLegend           |
|                             | IgD                          | PerCP-Cy5.5         | IA6-2          | BD<br>Biosciences   |
|                             | IgM                          | APC                 | MHM-88         | BioLegend           |
|                             | IL-21R                       | PE                  | 2G1-K12        | BioLegend           |
| <b>Surface Panel 2</b>      | CD19                         | AF700               | HIB19          | BioLegend           |
|                             | CD27                         | BV421               | O323           | BioLegend           |
|                             | CD38                         | PE-Cy7              | HIT2           | BioLegend           |
|                             | CD24                         | FITC                | ML5            | BioLegend           |
|                             | CD5                          | PE                  | UCHT2          | BioLegend           |
|                             | CD25*                        | APC                 | M-<br>A251+2A3 | BD<br>Biosciences   |
|                             | <b>Intracellular Panel 1</b> | CD19                | AF700          | HIB19               |
| CD27                        |                              | BV421               | O323           | BioLegend           |
| CD38                        |                              | PE-Cy7              | HIT2           | BioLegend           |
| CD24                        |                              | FITC                | ML5            | BioLegend           |
| IgM                         |                              | APC                 | MHM-88         | BioLegend           |
| IL-10 (IC)                  |                              | PE                  | JES3-19F1      | BioLegend           |
| Viability Dye               |                              | eFluor780           | -              | eBioscience         |

Anti-human monoclonal antibodies used for the B-cell immunophenotyping. \*2 clones of anti-CD25 that bind to different epitopes were used simultaneously to enhance CD25 staining. IC, Isotype control.

**Table S2. Reproducibility of the assessed B-cell subsets**

| <b>Phenotype</b>                | <b>Delineation markers</b>                                                | <b>N</b> | <b><math>\rho</math></b> |
|---------------------------------|---------------------------------------------------------------------------|----------|--------------------------|
| Total CD19 <sup>+</sup> B cells | CD19 <sup>+</sup>                                                         | 18       | 0.778                    |
| Naïve B cells                   | CD19 <sup>+</sup> CD27 <sup>-</sup>                                       | 18       | 0.995                    |
| Memory B cells                  | CD19 <sup>+</sup> CD27 <sup>+</sup>                                       | 18       | 0.999                    |
| Anergic B cells                 | CD19 <sup>+</sup> CD27 <sup>-</sup> IgD <sup>+</sup> IgM <sup>-</sup>     | 18       | 0.359                    |
| Transitional B cells            | CD19 <sup>+</sup> CD27 <sup>-</sup> CD24 <sup>hi</sup> CD38 <sup>hi</sup> | 18       | 0.963                    |
| Marginal zone B cells           | CD19 <sup>+</sup> CD27 <sup>+</sup> IgD <sup>+</sup> IgM <sup>+</sup>     | 18       | 0.925                    |
| CD5 <sup>+</sup> B cells        | CD19 <sup>+</sup> CD5 <sup>+</sup>                                        | N/A      | N/A                      |

Reproducibility of the assessed B-cell phenotypes was determined by comparing repeated measurements from 18 donors performed between 1-2 months after the original measurement.  $\rho$ , correlation coefficient; N/A, not available.

**Table S3. Association of the B-cell phenotypes with duration of disease.**

| Phenotype                                                                          | N  | P value | $\beta$<br>(95% CI)           |
|------------------------------------------------------------------------------------|----|---------|-------------------------------|
| <b><i>B cell subsets</i></b>                                                       |    |         |                               |
| Total CD19 <sup>+</sup> B cells                                                    | 43 | 0.812   | 0.002<br>(-0.019 / 0.023)     |
| Naïve B cells (CD27 <sup>-</sup> )                                                 | 43 | 0.757   | 0.008<br>(-0.066 / 0.051)     |
| Memory B cells (CD27 <sup>+</sup> )                                                | 43 | 0.856   | 0.004<br>(-0.051 / 0.060)     |
| Transitional B cells<br>(CD27 <sup>+</sup> CD24 <sup>hi</sup> CD38 <sup>hi</sup> ) | 43 | 0.358   | 0.007<br>(-0.025 / 0.011)     |
| Marginal zone B cells<br>(CD27 <sup>+</sup> IgD <sup>+</sup> IgM <sup>+</sup> )    | 43 | 0.360   | 0.014<br>(-0.022 / 0.050)     |
| CD5 <sup>+</sup> B cells                                                           | 28 | 0.087   | 0.061<br>(-0.025 / 0.147)     |
| <b><i>IL-10 production<sup>1</sup></i></b>                                         |    |         |                               |
| IL-10 <sup>+</sup> Total B cells                                                   | 33 | 0.388   | -0.0017<br>(-0.0063 / 0.0030) |
| IL-10 <sup>+</sup> Naïve B cells                                                   | 33 | 0.325   | -0.0016<br>(-0.0054 / 0.0023) |
| IL-10 <sup>+</sup> Memory B cells                                                  | 33 | 0.389   | -0.0021<br>(-0.0079 / 0.0037) |

Effect of duration of disease was calculated using a linear regression model including age and batch as covariates.  $\beta$  = beta coefficient and 95% confidence interval (CI) of the linear regression model. <sup>1</sup>Statistical tests were performed on log-transformed data because IL-10 phenotypes showed a strong right skew.
